# Supplementary material for: Polysiloxane–silica hybrids from novel precursors by the sol–gel process
Source: Royal Society of Chemistry journal article supplement (doi:10.1039/b501833c), 2005-01-01
Supplement: b501833c.pdf [file b501833c.pdf]

Figure S1 a, b, c.  $^1\text{H}$ ,  $^{13}\text{C}$ ,  $^{29}\text{Si}$  NMR spectra of 1,1,1,7-tetramethoxy-3,3,5,5,7,7-hexamethyl-1,3,5,7-tetrasiloxane, {TMOS-D<sub>3</sub>}.

Figure S2 a, b, c.  $^1\text{H}$ ,  $^{13}\text{C}$ ,  $^{29}\text{Si}$  NMR spectra of 1,1,1,7-tetramethoxy-3,5,7-trimethyl-3,5,7-trivinyl-1,3,5,7-tetrasiloxane, {TMOS-V<sub>3</sub>}.

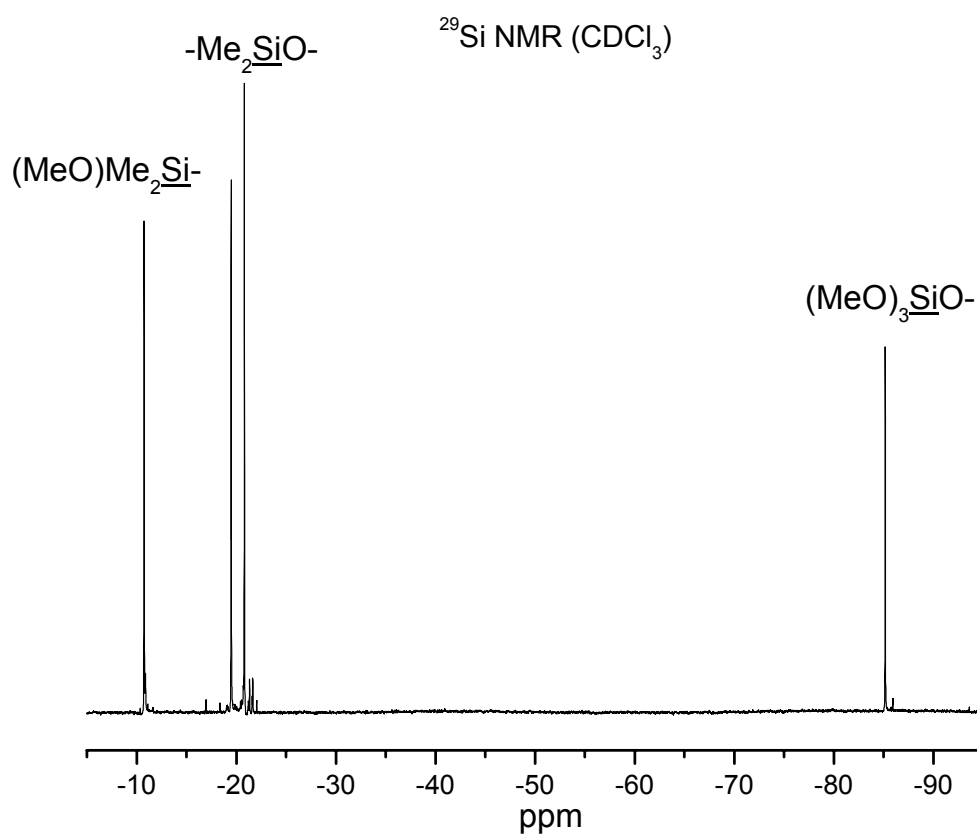

Figure S1 a

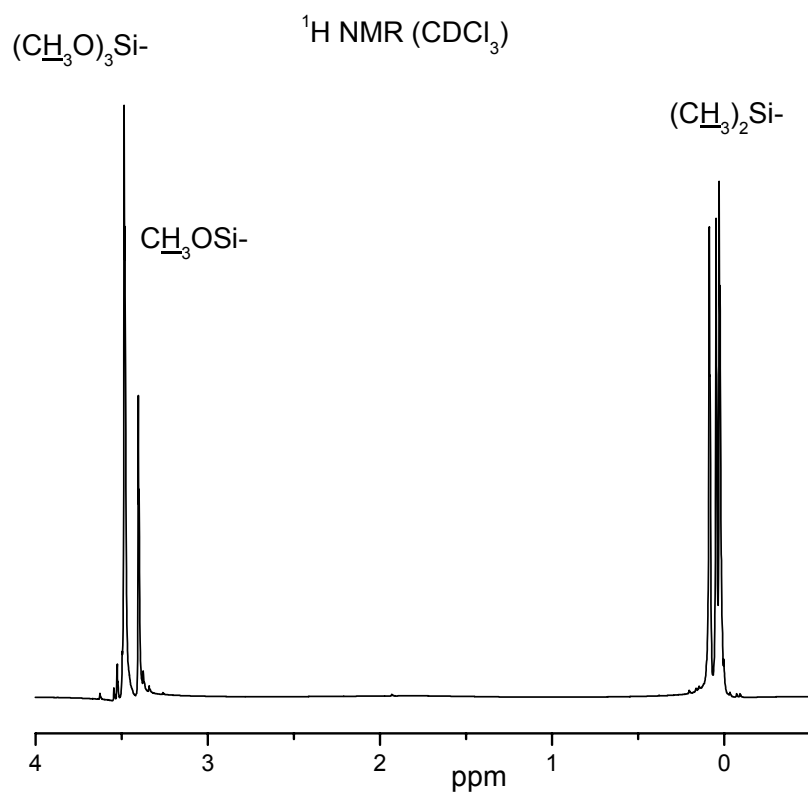

Figure S1 b

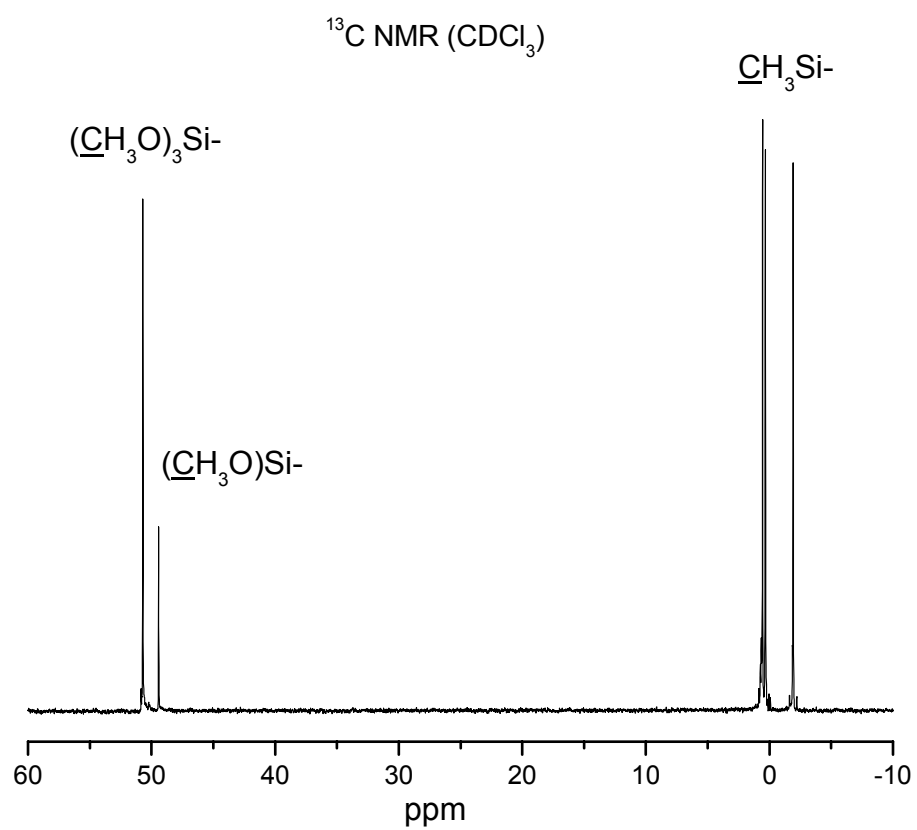

Figure S1 c

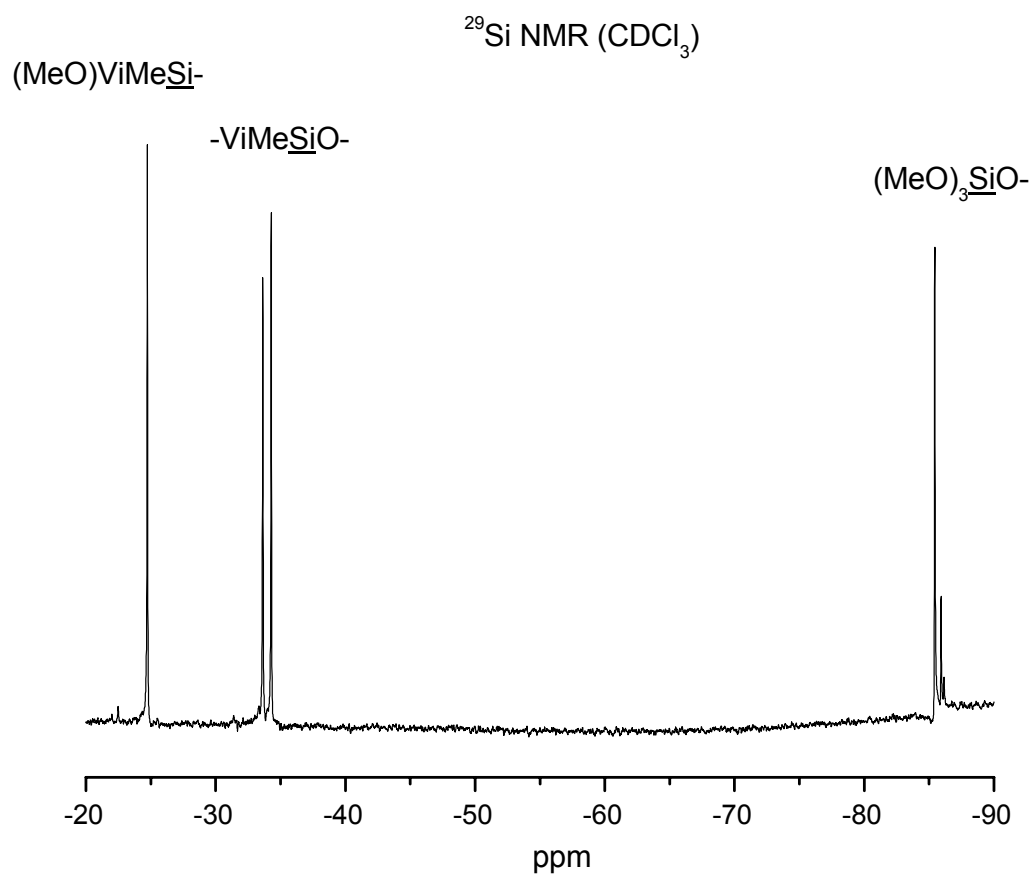

Figure S2 a

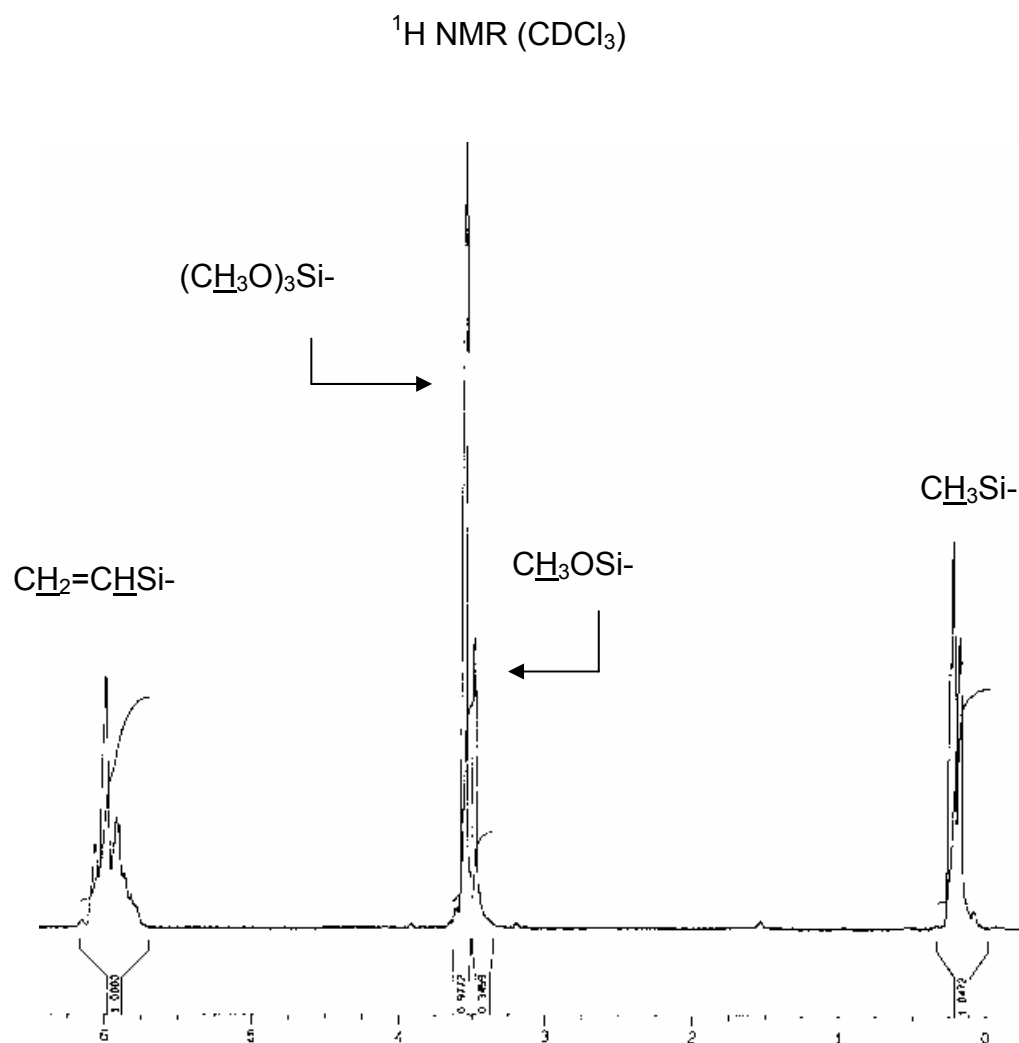

Figure S2 b

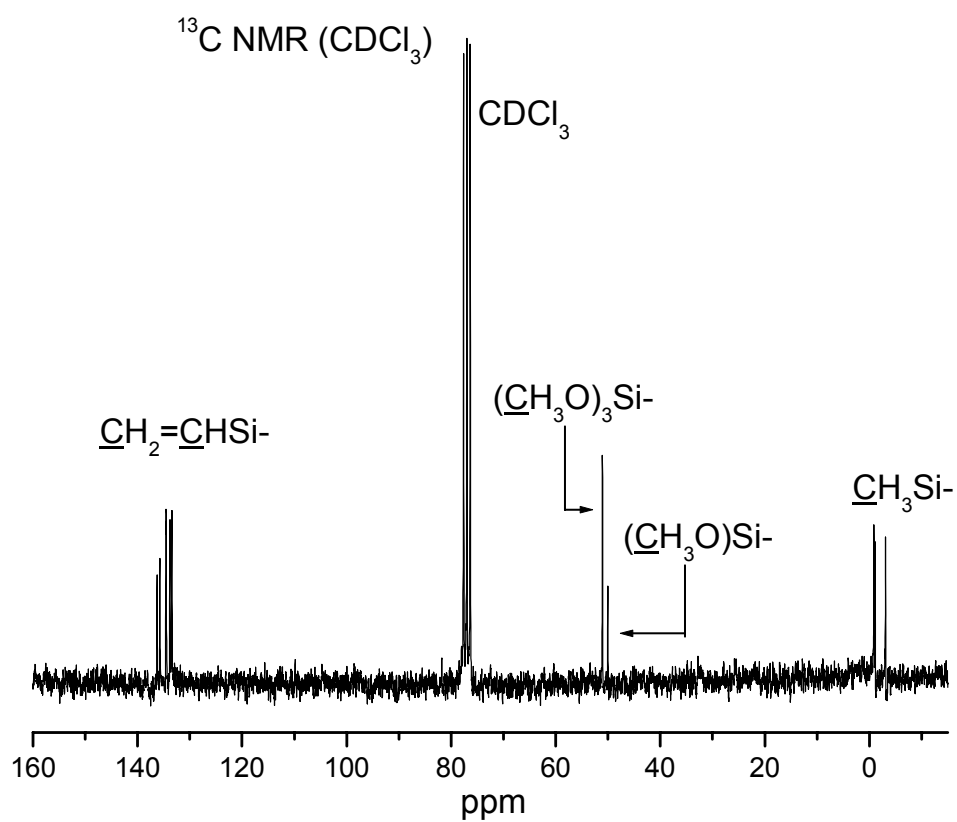

Figure S2 c
